# Supplementary material for: Genotype-Phenotype Correlation and Functional Insights for Two Monoallelic <i>Trex1</i> Missense Variants Affecting the Catalytic Core
Source: Preprints.org preprint supplement (doi:10.20944/preprints202206.0372.v1), 2022-06-28
Supplement: Supplementary file 2 [file supplementary]

**
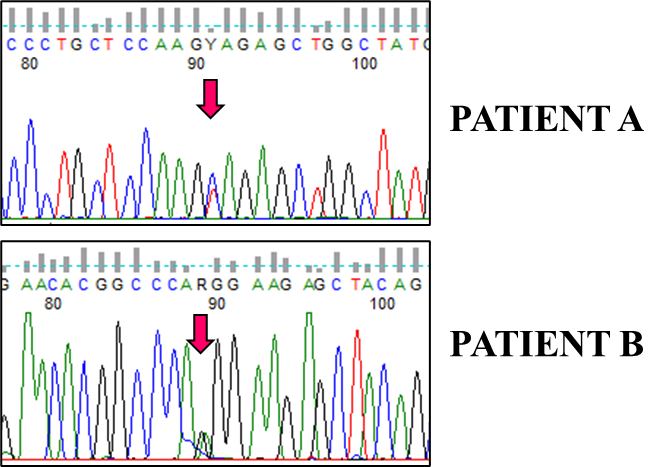
**

**Supplemental Figure 1**: **TREX1 electropherograms of patients A and B.** The chromatograms show the presence of c.407C>T (p.A136V) (upper panel) and c.520A>G (p.R174G) (lower panel) variants in patient A and B, respectively.


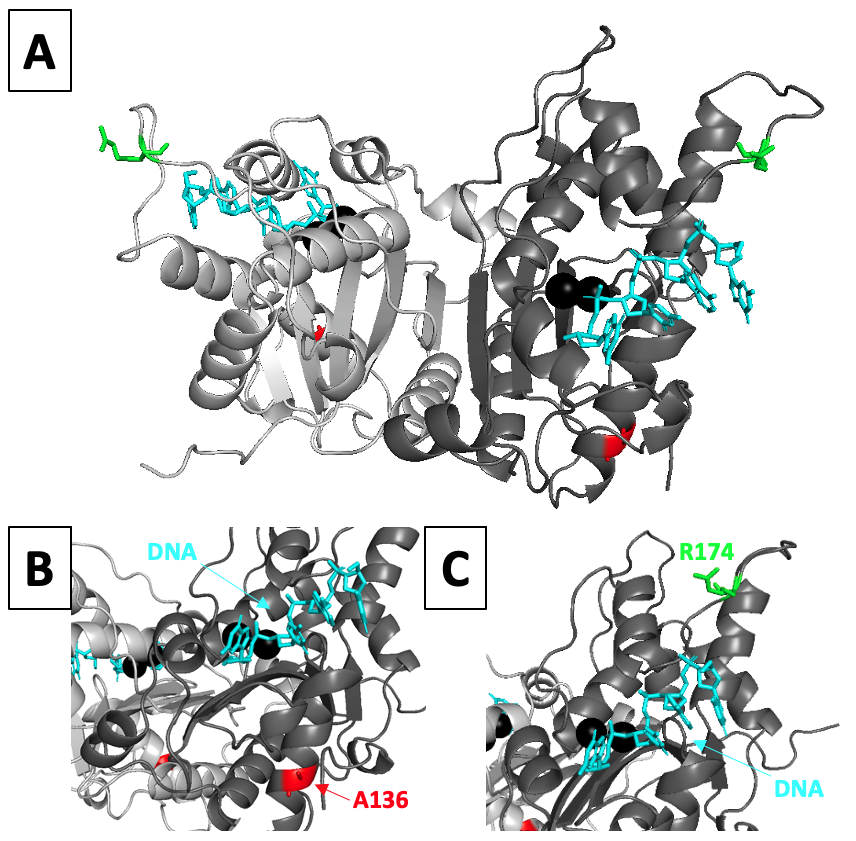


**Supplemental Figure 2:** **Structural context of hTREX1’s mutated residues.** A structure of mTREX11-242 bound to ssDNA (PDB = ‘2IOC’) was used as a template with MODELLER v9.22 to model the hTREX11-242 structure with the originally disordered loops resolved. The respective protomers of the hTREX1 homodimer are shown as dark and light grey cartoons, 4-mer oligos (‘DNA’) are shown as blue sticks, divalent metal ions are shown as black spheres, A136 residues are shown as red sticks, and R174 residues are shown as green sticks. Graphics were generated with PyMOL v2.3.2 (The PyMOL Molecular Graphics System, Version 2.0 Schrödinger, LLC), and figure was prepared in PowerPoint.


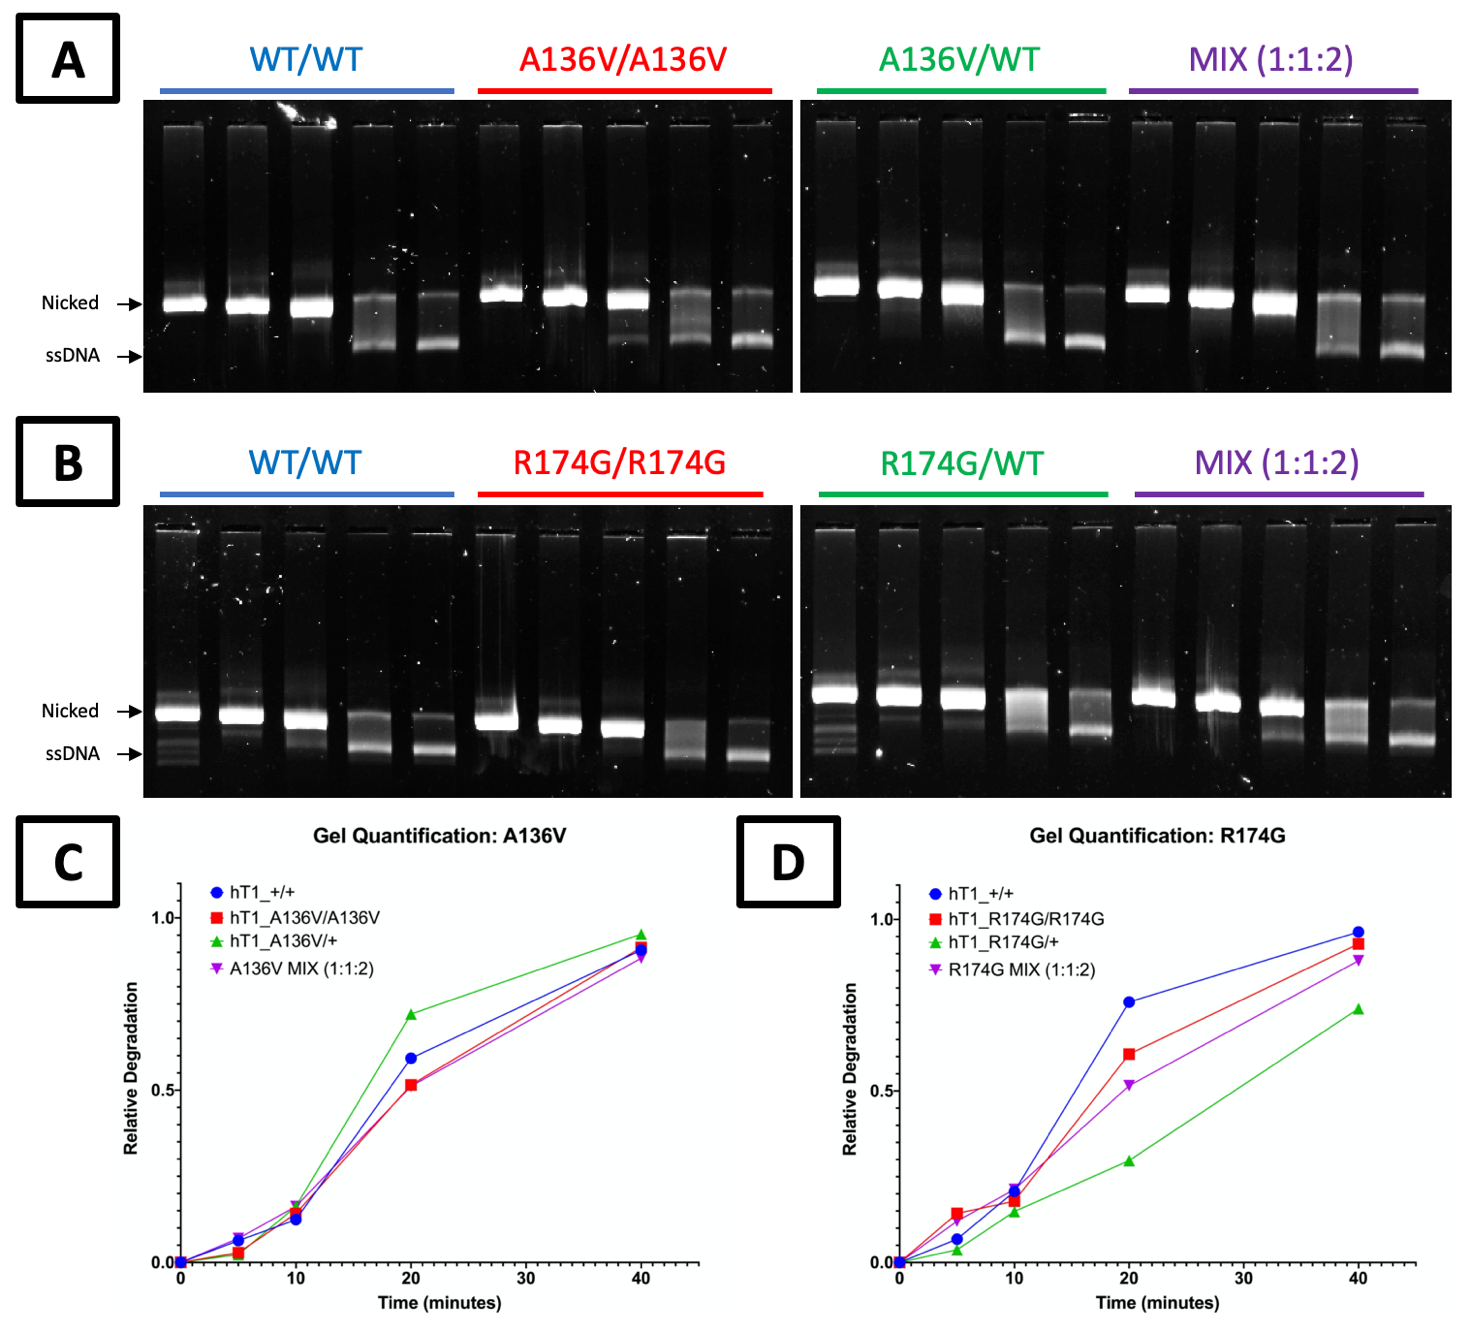


**Supplemental Figure 3: dsDNA degradation by A136V and R174G variants.** **[a,b]** *Agarose Gel Visualization of TREX1 Exonuclease Activity*. Standard exonuclease reactions were prepared with equimolar concentrations of the indicated enzymes, incubated at room temperature for 0, 5, 10, 20, or 40 minutes, quenched in ethanol, then visualized on 0.8% agarose gels. Supercoiled dsDNA plasmid is nicked to generate initial substrate (‘Nicked), and TREX1 degrades one strand of the substrate over time to generate ssDNA plasmid (‘ssDNA’). **[c,d]** *Quantification of Agarose Gels*. Band intensity for each of the 0-minute lanes on the gels in panels a-b was quantified by densitometry, along with band intensity on the corresponding region of the associated lanes. Differences in band intensity were normalized to the 0-minute lanes’ band, and these values (‘Relative Degradation’) were plotted as a function of time. Gels and plots are representative of two separate experiments.


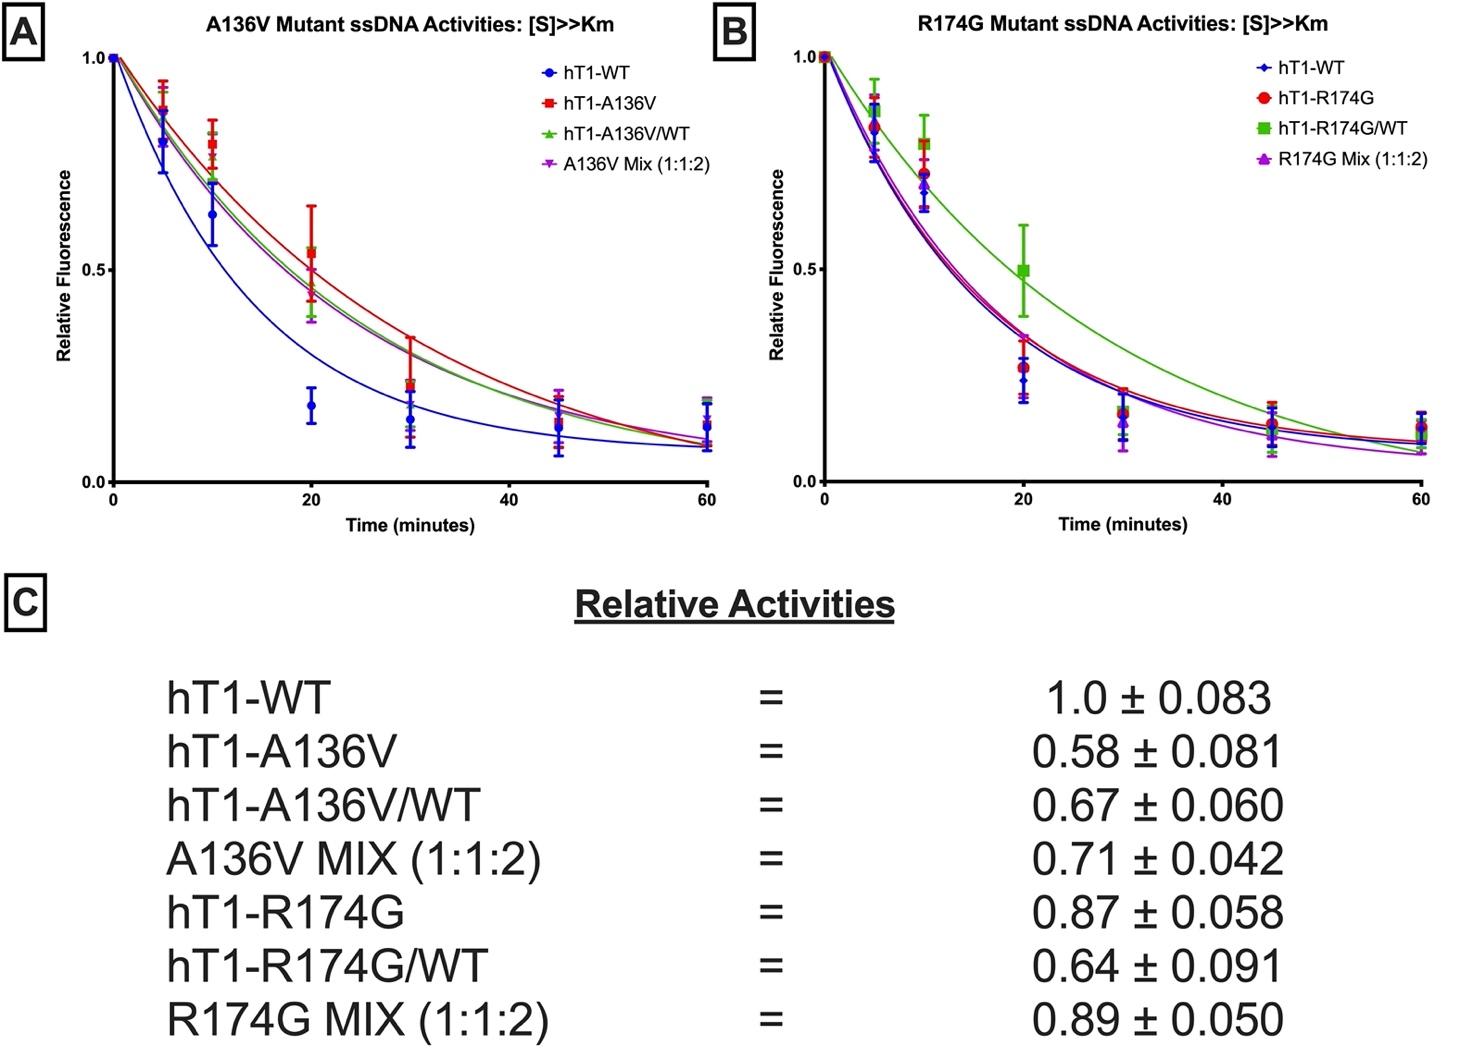


**Supplemental Figure 4: ssDNA degradation by A136V and R174G variants.** **[a,b]** *Fluorescence-Based Quantification of TREX1 dsDNA Degradation*. Standard exonuclease reactions were prepared with equimolar concentrations of the indicated enzymes, incubated at room temperature for the indicated times, quenched in QuantiFluor ssDNA dye, and ssDNA content measured by fluorescence. Plots of fluorescence vs time were generated and fit with one-phase decay nonlinear regression in Prism 7.0 (GraphPad). Plots are composites of 18 different reactions from 3 different experiments. Data points indicate mean, and error bars represent standard deviation. **[c]** *Activity Rates of TREX1 Variants*. Initial velocities were quantified from the respective regression lines in panels a-b and normalized to wild-type initial velocity to calculate relative activity. Values are mean and standard deviation. ‘[S] >> Km’ refers to ~5 µM of a 30-mer oligo.


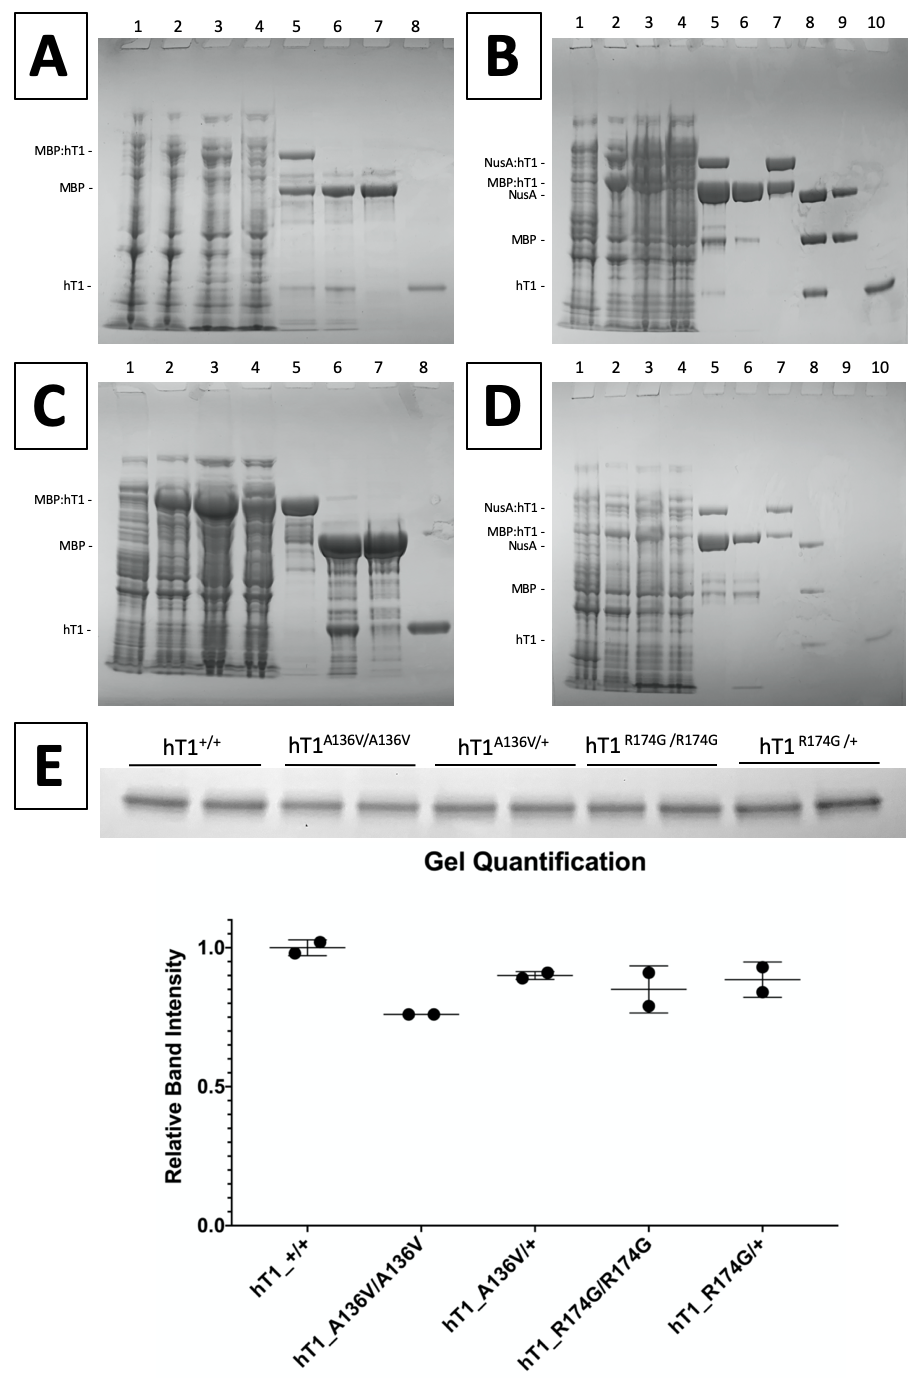


**Supplemental Figure 5: Quality control data from A136V and R174G preps.** **[a,c]** *Chromatography Purification of hT1A136V/A136V (panel a) & hT1R174G/R174G (panel c).* Samples were taken at the indicated steps of chromatography purification and visualized by SDS-PAGE with Coomassie staining. (1) pre-induction culture sample, (2) post-induction culture sample, (3) nickel column applicant, (4) nickel column wash, (5) nickel column eluent, (6) post-cleavage p-cell column applicant, (7) p-cell column wash, & (8) p-cell column eluent. **[b,d]** *Chromatography Purification of hT1A136V/+ (panel b) & hT1R174G /+ (panel d).* (1) pre-induction culture sample, (2) post-induction culture sample, (3) amylose column applicant, (4) amylose column wash, (5) amylose column eluent / nickel column applicant, (6) nickel column wash, (7) nickel column eluent, (8) post-cleavage p-cell column applicant, (9) p-cell column wash, & (10) p-cell column eluent. **[e]** *Validation of Enzyme Purities and Concentrations.* Protein content of preps was visualized via SDS-PAGE with Coomassie staining. Enzyme preps were used to load 0.75 µg each, as measured by A280, onto a 12% gel. Band intensities were quantified using GelAnalyzer 19.1, then plotted as mean and range. Graph was prepared with Prism 7.0 (GraphPad), and figure was assembled in PowerPoint.

**Supplemental Table 1:** genes responsible for Mendelian conditions causing monogenic forms of stroke.

| **GENE** | **OMIM# gene** | **OMIM# disease** | **inheritance pattern** | **GenBank ID** | **coding exons** | **target submitted (bp)** | **target designed (bp)** | **missed (bp)** | **covered (%)** | **Reference**  **(PMID)** |
| --- | --- | --- | --- | --- | --- | --- | --- | --- | --- | --- |
| ABCA1 | 600046 | 604091  205400 | AD  AR | NM_005502 | 49 | 7276 | 7276 | 0 | 100 | 30278532 |
| ABCC6 | 603234 | 614473  264800  177850 | AR  AR  AD | NM_001171 | 31 | 4903 | 4755 | 148 | 96,98 | 24008425  29709427  29722917 |
| ABCD4 | 603214 | 614857 | AR | NM_005050 | 19 | 2771 | 2771 | 0 | 100 | 20301503 |
| ABCG5 | 605459 | 618666 | AR | NM_022436 | 13 | 2606 | 2606 | 0 | 100 | 11099417 |
| ABCG8 | 605460 | 210250 | AR | NM_022437 | 13 | 2672 | 2672 | 0 | 100 | 11099417 |
| ACP5 | 171640 | 607944 | AR | NM_001111036 | 4 | 1178 | 1178 | 0 | 100 | 26951490 |
| ACTA2 | 102620 | 611788  613834 | AD | NM_001613 | 8 | 1214 | 1214 | 0 | 100 | 19409525  30661495 |
| ACTN1 | 102575 | 615193 | AD | NM_001102 | 22 | 3845 | 3845 | 0 | 100 | 30356112 |
| ACVRL1 | 601284 | 600376 | AD | NM_000020 | 9 | 1602 | 1602 | 0 | 100 | 31637968 |
| ADAMTS13 | 604134 | 274150 | AR | NM_139025 | 29 | 5734 | 5722 | 12 | 99,79 | 30356112 |
| ADAR | 146920 | 615010 | AR | NM_001111 | 15 | 4431 | 4431 | 0 | 100 | 25672750 |
| ALG8 | 608103 | 608104 | AR | NM_024079 | 14 | 2336 | 2231 | 105 | 95,5 | 12480927 |
| ANO6 | 608663 | 262890 | AR | NM_001025356 | 23 | 4226 | 4226 | 0 | 100 | 30356112 |
| APP | 104760 | 605714 | AD | NM_201413 | 19 | 2545 | 2545 | 0 | 100 | 7131028 |
| ATP7A | 300011 | 309400 | XLR | NM_000052.7 | 22 | 4723 | 4723 | 0 | 100 | 11118799 |
| BGN | 301870 | 300989 | XL | NM_001711.6 | 7 | 1457 | 1457 | 0 | 100 | 27632686 |
| BRAF | 164757 | 115150  613707  613706 | AD | NM_001374258.1 | 18 | 2481 | 2481 | 0 | 100 | 12187019 |
| BRCC3 | 300617 | 300845 | XLR | NM_001018055.3 | 11 | 1504 | 1504 | 0 | 100 | 25733922 |
| C1R | 613785 | 130080 | AD | NM_001733.7 | 9 | 2336 | 2336 | 0 | 100 | 25485215 |
| CBS | 613381 | 236800 | AR | NM_000071.3 | 15 | 1806 | 1806 | 0 | 100 | 26689889 |
| CCER2 | 617634 | - | - | NM_001243212 | 5 | 851 | 851 | 0 | 100 | 27717682 |
| CCM1 | 604214 | 116860 | AD | NM_004912 | 16 | 2851 | 2851 | 0 | 100 | 9811928 |
| CCM2 | 607929 | 603284 | AD | NM_031443.4 | 11 | 1868 | 1868 | 0 | 100 | 9811928 |
| CD59 | 107271 | 612300 | AR | NM_000611 | 3 | 537 | 537 | 0 | 100 | 25716358 |
| CECR1 | 607575 | 182410  615688 | AR | NM_001282225.2 | 10 | 2066 | 2066 | 0 | 100 | 24552284 |
| COG6 | 606977 | 614576 | AR | NM_020751.3 | 20 | 2996 | 2996 | 0 | 100 | 20605848 |
| COL1A1 | 120150 | 130060 | AD | NM_000088.4 | 51 | 4905 | 4905 | 0 | 100 | 28089253  12695216 |
| COL1A2 | 120160 | 617821  225320 | AD  AR | NM_000089.4 | 52 | 4621 | 4621 | 0 | 100 | 28089253  12695216 |
| COL3A1 | 120180 | 130050  618343 | AD  AR | NM_000090.4 | 51 | 4911 | 4911 | 0 | 100 | 12786757 |
| COL4A1 | 120130 | 611773  175780  618564 | AD | NM_001845.6 | 53 | 5564 | 5564 | 0 | 100 | 30413629 |
| COL4A2 | 120090 | 614483 | AD | NM_001846.4 | 47 | 7489 | 7489 | 0 | 100 | 30413629 |
| COL4A3 | 120070 | 203780  104200 | AR  AD | NM_000091 | 52 | 5533 | 5533 | 0 | 100 | 10893738 |
| COL4A4 | 120131 | 203780 | AD | NM_000092 | 47 | 7423 | 7423 | 0 | 100 | 10893738 |
| COL4A5 | 303630 | 301050 | XLD | NM_000495 | 51 | 5573 | 5573 | 0 | 100 | 30045277 |
| COL4A6 | 303631 | - | - | NM_001847 | 47 | 7488 | 7488 | 0 | 100 | 30045277 |
| COL5A1 | 120215 | 130000 | AD | NM_000093 | 67 | 6256 | 6256 | 0 | 100 | 17053184 |
| COL5A2 | 120190 | 130010 | AD | NM_000393 | 54 | 7200 | 7200 | 0 | 100 | 17053184 |
| CST3 | 604312 | 105150 | AD | NM_000099 | 3 | 591 | 591 | 0 | 100 | 3472718 |
| CTSA | 613111 | - | AD | NM_000308 | 15 | 2247 | 2247 | 0 | 100 | 27664989 |
| CYP11B1 | 610613 | 202010  103900 | AR  AD | NM_000497 | 9 | 1602 | 1602 | 0 | 100 | 10852446 |
| DPM1 | 603503 | 608799 | AR | NM_003859 | 10 | 1388 | 1321 | 67 | 95,1 | 15669674 |
| DYRK1B | 604556 | 615812 | AD | NM_004714 | 10 | 2390 | 2390 | 0 | 100 | 24827035 |
| ELN | 130160 | 123700  185500 | AD | NM_001278939 | 34 | 4094 | 4094 | 0 | 100 | 18348261 |
| ENG | 131195 | 187300 | AD | NM_000118 | 15 | 2753 | 2753 | 0 | 100 | 27352867  31637968 |
| ENPP1 | 173335 | 208000  615522  613312 | AR  AD  AR | NM_006208 | 25 | 4028 | 4028 | 0 | 100 | 19206175 |
| EPAS1 | 603349 | 611783 | AD | NM_001430 | 16 | 3413 | 3413 | 0 | 100 | 18184961 |
| EPHB4 | 600011 | 618196 | AD | NM_004444 | 17 | 3134 | 3134 | 0 | 100 | 28687708 |
| EPOR | 133171 | 133100 | AD | NM_000121 | 8 | 1927 | 1927 | 0 | 100 | 3371213 |
| ESCO2 | 609353 | - | - | NM_001017420 | 10 | 2306 | 2306 | 0 | 100 | 1642282 |
| F10 | 613872 | 227600 | AR | NM_000504 | 8 | 1867 | 1867 | 0 | 100 | 3732313 |
| F13A1 | 134570 | 613225 | AR | NM_000129 | 14 | 2899 | 2899 | 0 | 100 | 9550516 |
| F13B | 134580 | 613235 | AR | NM_001994 | 12 | 2586 | 2586 | 0 | 100 | 30356112 |
| F2 | 176930 | 613679  188050 | AR  AD | NM_000506 | 14 | 2009 | 2009 | 0 | 100 | 28160964 |
| F5 | 612309 | 227400  188055 | AR  AD | NM_000130 | 25 | 6925 | 6925 | 0 | 100 | 30635457 |
| F7 | 613878 | 227500 | AR | NM_000131 | 9 | 1761 | 1761 | 0 | 100 | 30356112 |
| F8 | 300841 | 306700 | XLR | NM_000132 | 27 | 7350 | 7350 | 0 | 100 | 30356112 |
| F9 | 300746 | 306900  300807 | XLR | NM_000133 | 8 | 1466 | 1466 | 0 | 100 | 19846852 |
| FBLN4 | 604633 | 614437 | AR | NM_016938 | 10 | 1432 | 1432 | 0 | 100 | 8985490 |
| FBLN5 | 604580 | 614434  219100  608895 | AD  AR  AD | NM_006329 | 11 | 1897 | 1897 | 0 | 100 | 8985490 |
| FBN1 | 134797 | 604308  154700 | AD | NM_000138 | 65 | 9266 | 9266 | 0 | 100 | 29030048 |
| FGA | 134820 | 202400  616004 | AR  AD/AR | NM_021871 | 6 | 2705 | 2705 | 0 | 100 | 19598064 |
| FGB | 134830 | 202400  616400 | AR  AD/AR | NM_005141 | 8 | 1876 | 1876 | 0 | 100 | 19598064 |
| FGG | 134850 | 202400  616400 | AR  AD/AR | NM_000509 | 10 | 1877 | 1877 | 0 | 100 | 19598064 |
| FLI1 | 193067 | 617443 | AD  AR | NM_001271010 | 10 | 1491 | 1491 | 0 | 100 | 30356112 |
| FLNA | 300017 | 300049  314400 | XLD  XL | NM_001110556 | 47 | 10294 | 10294 | 0 | 100 | 9883725 |
| FOXC1 | 601090 | 602482 | AD | NM_001453 | 1 | 1672 | 1672 | 0 | 100 | 25250569 |
| GAA | 606800 | 232300 | AR | NM_001079803 | 19 | 3049 | 3049 | 0 | 100 | 3322184 |
| GCDH | 608801 | 231670 | AR | NM_000159 | 12 | 1481 | 1484 | 0 | 100 | 28411331 |
| GDF2 | 605120 | 615506 | AD | NM_016204 | 2 | 1390 | 1390 | 0 | 100 | 31637968 |
| GFI1B | 604383 | 187900 | AD  AR | NM_004188 | 6 | 1293 | 1293 | 0 | 100 | 30356112 |
| GGCX | 137167 | 610842  277450 | digenic  AR | NM_000821 | 15 | 3053 | 3053 | 0 | 100 | 12384421 |
| GLA | 300644 | 301500 | XL | NM_000169 | 7 | 1360 | 1360 | 0 | 100 | 33835733 |
| GP1BA | 606672 | 231200  153670  177820 | AR  AD  AD | NM_000173 | 1 | 2009 | 2009 | 0 | 100 | 30356112 |
| GP1BB | 138720 | 231200 | AR | NM_000407 | 2 | 641 | 641 | 0 | 100 | 30356112 |
| GP6 | 605546 | 614201 | AR | NM_016363 | 8 | 2263 | 2263 | 0 | 100 | 30356112 |
| GP9 | 173515 | 231200 | AR | NM_000174 | 1 | 584 | 584 | 0 | 100 | 30356112 |
| GUCY1A3 | 139396 | 615750 | AR | NM_000856 | 8 | 2157 | 2157 | 0 | 100 | 25733922 |
| HBB | 141900 | 603903 | AR | NM_000518 | 3 | 474 | 474 | 0 | 100 | 7782612 |
| HRG | 142640 | 613116 | AD | NM_000412 | 7 | 1928 | 1928 | 0 | 100 | 29108964  8475479 |
| HTRA1 | 602194 | 600142  616779 | AR  AD | NM_002775 | 9 | 1893 | 1893 | 0 | 100 | 32719647 |
| IFIH1 | 606951 | 615846 | AD | NM_022168 | 16 | 3878 | 3878 | 0 | 100 | 175395 |
| ITGA2 | 192974 | - | - | NM_002203 | 30 | 5046 | 5046 | 0 | 100 | 30356112 |
| ITGA2B | 607759 | 187800 | AD | NM_000419 | 30 | 4620 | 4620 | 0 | 100 | 30356112 |
| ITGB3 | 173470 | 619271 | AD | NM_000212 | 15 | 2517 | 2517 | 0 | 100 | 30356112 |
| ITM2B | 603904 | 176500  117300 | AD | NM_021999 | 6 | 1101 | 1101 | 0 | 100 | 10391242 |
| IVD | 607036 | 243500 | AR | NM_002225 | 12 | 1401 | 1401 | 0 | 100 | 20142522 |
| JAG1 | 601920 | 118450 | AD | NM_000214 | 26 | 3917 | 3917 | 0 | 100 | 14993126 |
| JAK2 | 147796 | 614521 | AD | NM_004972 | 23 | 3629 | 3629 | 0 | 100 | 22397670 |
| JAM3 | 606871 | 613730 | AR | NM_032801 | 9 | 1383 | 1383 | 0 | 100 | 21109224 |
| KNG1 | 612358 | 228960 | AR | NM_000893 | 11 | 2566 | 2566 | 0 | 100 | 12576314 |
| KRAS | 190070 | 609942 | AD | NM_004985 | 5 | 737 | 737 | 0 | 100 | 12187019 |
| LDLR | 606945 | 143890 | AD/AR | NM_001195799 | 18 | 2763 | 2763 | 0 | 100 | 1301956 |
| LDLRAP1 | 605747 | 603813 | AR | NM_015627 | 9 | 1377 | 1377 | 0 | 100 | 9626156 |
| LMAN1 | 601567 | 227300 | AR | NM_005570 | 13 | 2183 | 2183 | 0 | 100 | 30356112 |
| LMBRD1 | 612625 | 277380 | AR | NM_018368 | 16 | 2423 | 2423 | 0 | 100 | 20301503 |
| LMNA | 150330 | 115200 | AD | NM_170707 | 15 | 2369 | 2369 | 0 | 100 | 19095983 |
| LOX | 153455 | 617168 | AD | NM_001178102 | 7 | 1604 | 1604 | 0 | 100 | 27432961 |
| LZTR1 | 600574 | 616564  605275 | AD  AR | NM_006767 | 21 | 2733 | 2733 | 0 | 100 | 12187019 |
| MCFD2 | 607788 | 613625 | AR | NM_001171507 | 4 | 733 | 733 | 0 | 100 | 30356112 |
| MFAP5 | 601103 | 616166 | AD | NM_003480 | 9 | 972 | 972 | 0 | 100 | 25434006 |
| MGAT2 | 602616 | 212066 | AR | NM_002408 | 1 | 1394 | 1394 | 0 | 100 | 19419693  1159665 |
| MMACHC | 609831 | 277400 | AR | NM_015506 | 4 | 889 | 889 | 0 | 100 | 18986243 |
| MMADHC | 611935 | 277410 | AR | NM_015702 | 7 | 961 | 961 | 0 | 100 | 20301409 |
| MPI | 154550 | 602579 | AR | NM_002435 | 8 | 1672 | 1672 | 0 | 100 | 10484808 |
| MPL | 159530 | 601977  604498 | AD  AR | NM_005373 | 12 | 2028 | 2028 | 0 | 100 | 15269348 |
| MTHFR | 607093 | 236250 | AR | NM_005957 | 11 | 2081 | 2081 | 0 | 100 | 26839351  29849257 |
| MTRR | 602568 | 236270 | AR | NM_002454 | 15 | 2328 | 2279 | 49 | 97,9 | 29849257 |
| MTR | 156570 | 250940 | AR | NM_000254 | 33 | 4128 | 4128 | 0 | 100 | 29849257 |
| MYH11 | 160745 | 132900 | AD | NM_002474 | 42 | 6391 | 6391 | 0 | 100 | 30661495 |
| MYLK | 600922 | 613780 | AD | NM_053025 | 31 | 6055 | 6055 | 0 | 100 | 29544503  26147384 |
| NBEAL2 | 614169 | 139090 | AR | NM_015175 | 54 | 10965 | 10965 | 0 | 100 | 30356112 |
| NF1 | 613113 | 162200  601321 | AD | NM_001042492 | 58 | 9161 | 9161 | 0 | 100 | 30661495 |
| NOTCH1 | 190198 | 616028  109730 | AD | NM_017617 | 34 | 8008 | 7987 | 21 | 99,7 | 25132448  9631276 |
| NOTCH3 | 600276 | 125310 | AD | NM_000435 | 33 | 7296 | 7296 | 0 | 100 | 19539236 |
| NRAS | 164790 | 613224 | AD | NM_002524 | 4 | 610 | 610 | 0 | 100 | 12187019 |
| P2RY12 | 600515 | 609821 | AR | NM_022788 | 1 | 1079 | 1079 | 0 | 100 | 30356112 |
| PCCA | 232000 | 606054 | AR | NM_000282 | 24 | 2427 | 2427 | 0 | 100 | 18986243 |
| PCCB | 232050 | 606054 | AR | NM_000532 | 16 | 2480 | 2480 | 0 | 100 | 18986243 |
| PCNT | 605925 | 210720 | AR | NM_006031 | 47 | 12361 | 12361 | 0 | 100 | 34016138 |
| PDCD10 | 609118 | 603285 | AD | NM_007217 | 7 | 989 | 989 | 0 | 100 | 17041941 |
| PDE3A | 123805 | 112410 | AD | NM_000921 | 17 | 4321 | 4293 | 28 | 99,3 | 25961942 |
| PDE4D | 600129 | 614613 | AD | NM_001104631 | 22 | 4450 | 4450 | 0 | 100 | 22464250 |
| PGM1 | 171900 | 614921 | AR | NM_002633 | 12 | 2589 | 2589 | 0 | 100 | 10484808 |
| PITX2 | 601542 | 180500 | AD | NM_153426 | 5 | 1209 | 1209 | 0 | 100 | 25250569 |
| PKD1 | 601313 | 173900 | AD | NM_001009944 | 46 | 13372 | 13278 | 94 | 99,3 | 8130364  27567292 |
| PKD2 | 173910 | 613095 | AD | NM_000297 | 15 | 3057 | 3057 | 0 | 100 | 27567292 |
| PLAU | 191840 | 601709 | AD | NM_002658 | 11 | 1880 | 1880 | 0 | 100 | 30356112 |
| PLG | 173350 | 217090 | AR | NM_000301 | 19 | 2627 | 2627 | 0 | 100 | 8392398 |
| PLOD1 | 153454 | 225400 | AR | NM_000302 | 20 | 3325 | 3325 | 0 | 100 | 9617436 |
| PLOD3 | 603066 | 612394 | AR | NM_001084 | 19 | 3167 | 3167 | 0 | 100 | 18834968 |
| PMM2 | 601785 | 212065 | AR | NM_000303 | 8 | 1141 | 1141 | 0 | 100 | 29470411 |
| POLR3F | 617455 | - | AD | NM_006466 | 9 | 1041 | 1041 | 0 | 100 | 30115567 |
| PRDX1 | 176763 | 277400 | AR | NM_181697 | 5 | 650 | 650 | 0 | 100 | 29302025 |
| PRKACG | 176893 | 616176 | AR | NM_002732 | 1 | 1066 | 1066 | 0 | 100 | 30356112 |
| PRKG1 | 176894 | 615436 | AD | NM_001098512 | 19 | 3087 | 3087 | 0 | 100 | 23910461 |
| PROC | 612283 | 176860  612304 | AD  AR | NM_000312 | 8 | 1466 | 1466 | 0 | 100 | 20187890  1511989 |
| PROCR | 600646 | - | AD | NM_006404 | 4 | 757 | 757 | 0 | 100 | 11552992 |
| PROS1 | 176880 | 612336  614514 | AD  AR | NM_000313 | 16 | 2287 | 2287 | 0 | 100 | 20484936 |
| PTPN11 | 176876 | 163950 | AD | NM_002834 | 15 | 1936 | 1936 | 0 | 100 | 12187019 |
| RAF1 | 164760 | 611553 | AD | NM_002880 | 16 | 2107 | 2107 | 0 | 100 | 12187019 |
| RANBP2 | 602752 | - | - | NM_006267 | 29 | 9965 | 8963 | 1002 | 89,9 | 29593631 |
| RASA1 | 139150 | 608354 | AD | NM_002890 | 26 | 3412 | 3411 | 1 | 99,9 | 24038909 |
| RASGRP2 | 605577 | 615888 | AR | NM_001098671 | 15 | 2580 | 2580 | 0 | 100 | 30356112 |
| RIT1 | 609591 | 615355 | AD | NM_001256821 | 6 | 771 | 771 | 0 | 100 | 12187019 |
| RNASEH2A | 606034 | 610333 | AR | NM_006397 | 8 | 1300 | 1300 | 0 | 100 | 32642802 |
| RNASEH2B | 610326 | 610181 | AR | NM_024570 | 12 | 1572 | 1572 | 0 | 100 | 32642802 |
| RNASEH2C | 610330 | 610329 | AR | NM_032193 | 4 | 695 | 695 | 0 | 100 | 32642802 |
| RNF213 | 613768 | 607151 | AD  AR | NM_001256071 | 67 | 16462 | 16439 | 23 | 99,8 | 31650369  26147384 |
| SAG | 181031 | 258100 | AR | NM_000541 | 15 | 1968 | 1968 | 0 | 100 | 22665972 |
| SAMHD1 | 606754 | 612952 | AR | NM_015474 | 16 | 2681 | 2681 | 0 | 100 | 20842748 |
| SCN5A | 600163 | 614022 | AD | NM_001099404 | 28 | 6423 | 6423 | 0 | 100 | 16684018 |
| SERPINC1 | 107300 | 613118 | AD  AR | NM_000488 | 7 | 1465 | 1465 | 0 | 100 | 14347873 |
| SERPIND1 | 142360 | 612356 | AD | NM_000185 | 4 | 1540 | 1540 | 0 | 100 | 14347873 |
| SERPINE1 | 173360 | 613329 | AD  AR | NM_000602 | 8 | 1609 | 1609 | 0 | 100 | 1435917 |
| SKI | 164780 | 182212 | AD | NM_003036 | 7 | 2257 | 2217 | 40 | 98,2 | 24357594 |
| SLC19A2 | 603941 | 249270 | AR | NM_006996 | 6 | 1794 | 1794 | 0 | 100 | 10720020 |
| SLC20A2 | 158378 | 213600 | AD | NM_006749 | 10 | 2459 | 2459 | 0 | 100 | 30637044 |
| SLC2A10 | 606145 | 208050 | AR | NM_030777 | 5 | 1876 | 1876 | 0 | 100 | 17485657 |
| SLFN14 | 614958 | 616913 | AD | NM_001129820 | 4 | 2779 | 2779 | 0 | 100 | 30356112 |
| SMAD3 | 603109 | 613795 | AD | NM_005902 | 10 | 1452 | 1452 | 0 | 100 | 21778426 |
| SMAD4 | 600993 | 175050 | AD | NM_005359 | 11 | 1769 | 1769 | 0 | 100 | 31637968 |
| SMARCAL1 | 606622 | 242900 | AR | NM_014140 | 16 | 3665 | 3665 | 0 | 100 | 16840568 |
| SOS1 | 182530 | 610733 | AD | NM_005633 | 23 | 4232 | 4232 | 0 | 100 | 12187019 |
| SOS2 | 601247 | 616559 | AD | NM_006939 | 23 | 4919 | 4919 | 0 | 100 | 12187019 |
| SPARC | 182120 | 616507 | AR | NM_003118 | 9 | 1478 | 1478 | 0 | 100 | 26027498 |
| STAT1 | 600555 | 614162 | AD | NM_007315 | 23 | 2487 | 2487 | 0 | 100 | 28161409 |
| TBXA2R | 188070 | 614009 | AD | NM_001060 | 3 | 1423 | 1245 | 178 | 87,5 | 30356112 |
| TBXAS1 | 274180 | 614158 | AD | NM_001130966 | 14 | 2472 | 2472 | 0 | 100 | 30356112 |
| TEK | 600221 | 600195 | AD | NM_000459 | 23 | 4525 | 4525 | 0 | 100 | 19888299 |
| TGFB2 | 190220 | 614816 | AD | NM_003238 | 8 | 1409 | 1409 | 0 | 100 | 25835445 |
| TGFB3 | 190230 | 615582 | AD | NM_003239 | 7 | 1589 | 1589 | 0 | 100 | 25835445 |
| TGFBR1 | 190181 | 609192 | AD | NM_004612 | 9 | 1614 | 1614 | 0 | 100 | 15731757 |
| TGFBR2 | 190182 | 600168 | AD | NM_003242 | 8 | 1859 | 1859 | 0 | 100 | 22772368 |
| THBD | 188040 | 614486 | AD | NM_000361 | 1 | 1738 | 1738 | 0 | 100 | 26354877 |
| THPO | 600044 | 187950 | AD | NM_000460 | 6 | 1782 | 1782 | 0 | 100 | 9425899 |
| TREX1 | 606609 | 225750  192315 | AD/AR  AD | NM_033629 | 1 | 1160 | 1160 | 0 | 100 | 11438888 |
| VHL | 608537 | 263400 | AR | NM_000551 | 3 | 672 | 672 | 0 | 100 | 14726398 |
| VKORC1 | 608547 | 607473 | AR | NM_024006 | 4 | 776 | 776 | 0 | 100 | 30356112 |
| VWF | 613160 | 193400  277480  613554 | AD  AR  AD/AR | NM_000552.5 | 51 | 8952 | 08952 | 0 | 100 | 30356112 |
| XYLT1 | 608124 | 264800 | AR | NM_022166.4 | 12 | 3480 | 3477 | 3 | 99,9 | 16571645 |
| XYLT2 | 608125 | 264800 | AR | NM_022167.4 | 11 | 3148 | 3148 | 0 | 100 | 16571645 |
| YY1AP1 | 607860 | 602531 | AR | NM_001198903 | 11 | 2844 | 2844 | 0 | 100 | 27939641 |

Legend: AD=autosomal dominant; AR=autosomal recessive; XL=X-linked; bp=base pairs

**REFERENCES**

1. Perrino, F. W., Miller, H. & Ealey, K. A. Identification of a 3’-->5’-exonuclease that removes cytosine arabinoside monophosphate from 3’ termini of DNA. *J. Biol. Chem.* **269**, 16357–16363 (1994).

2. Mazur, D. J. & Perrino, F. W. Excision of 3′ Termini by the Trex1 and TREX2 3′→5′ Exonucleases CHARACTERIZATION OF THE RECOMBINANT PROTEINS. *J. Biol. Chem.* **276**, 17022–17029 (2001).

3. Belyakova, N. V. *et al.* Proof-reading 3’-->5’ exonucleases isolated from rat liver nuclei. *Eur. J. Biochem.* **217**, 493–500 (1993).

4. Mazur, D. J. & Perrino, F. W. Identification and Expression of the TREX1 and TREX2 cDNA Sequences Encoding Mammalian 3′→5′ Exonucleases. *J. Biol. Chem.* **274**, 19655–19660 (1999).

5. Silva, U. de *et al.* The Crystal Structure of TREX1 Explains the 3′ Nucleotide Specificity and Reveals a Polyproline II Helix for Protein Partnering. *J. Biol. Chem.* **282**, 10537–10543 (2007).

6. Orebaugh, C. D. *et al.* The TREX1 C-terminal Region Controls Cellular Localization through Ubiquitination. *J. Biol. Chem.* **288**, 28881–28892 (2013).

7. Hasan, M. *et al.* Cytosolic nuclease TREX1 regulates oligosaccharyltransferase activity independent of nuclease activity to suppress immune activation. *Immunity* **43**, 463–474 (2015).

8. Kucej, M., Fermaintt, C. S., Yang, K., Irizarry-Caro, R. A. & Yan, N. Mitotic Phosphorylation of TREX1 C Terminus Disrupts TREX1 Regulation of the Oligosaccharyltransferase Complex. *Cell Rep.* **18**, 2600–2607 (2017).

9. Chowdhury, D. *et al.* The Exonuclease TREX1 Is in the SET Complex and Acts in Concert with NM23-H1 to Degrade DNA during Granzyme A-Mediated Cell Death. *Mol. Cell* **23**, 133–142 (2006).

10. Morita, M. *et al.* Gene-Targeted Mice Lacking the Trex1 (DNase III) 3′→5′ DNA Exonuclease Develop Inflammatory Myocarditis. *Mol. Cell. Biol.* **24**, 6719–6727 (2004).

11. Simpson, S. R., Hemphill, W. O., Hudson, T. & Perrino, F. W. TREX1 – Apex predator of cytosolic DNA metabolism. *DNA Repair* 102894 (2020) doi:10.1016/j.dnarep.2020.102894.

12. Ablasser, A. *et al.* TREX1 Deficiency Triggers Cell-Autonomous Immunity in a cGAS-Dependent Manner. *J. Immunol.* **192**, 5993–5997 (2014).

13. Simpson, S. R. *et al.* T Cells Produce IFN-α in the TREX1 D18N Model of Lupus-like Autoimmunity. *J. Immunol.* (2019) doi:10.4049/jimmunol.1900220.

14. Peschke, K. *et al.* Loss of Trex1 in Dendritic Cells Is Sufficient To Trigger Systemic Autoimmunity. *J. Immunol. Baltim. Md 1950* **197**, 2157–2166 (2016).

15. Sun, L., Wu, J., Du, F., Chen, X. & Chen, Z. J. Cyclic GMP-AMP Synthase Is a Cytosolic DNA Sensor That Activates the Type I Interferon Pathway. *Science* **339**, 786–791 (2013).

16. Kranzusch, P. J., Lee, A. S.-Y., Berger, J. M. & Doudna, J. A. Structure of human cGAS reveals a conserved family of second-messenger enzymes in innate immunity. *Cell Rep.* **3**, 1362–1368 (2013).

17. Civril, F. *et al.* Structural mechanism of cytosolic DNA sensing by cGAS. *Nature* **498**, 332–337 (2013).

18. Gao, P. *et al.* Structure-Function Analysis of STING Activation by c[G(2′,5′)pA(3′,5′)p] and Targeting by Antiviral DMXAA. *Cell* **154**, 748–762 (2013).

19. Zhou, W. *et al.* Structure of the human cGAS–DNA complex reveals enhanced control of immune surveillance. *Cell* **174**, 300-311.e11 (2018).

20. Yang, Y.-G., Lindahl, T. & Barnes, D. E. Trex1 Exonuclease Degrades ssDNA to Prevent Chronic Checkpoint Activation and Autoimmune Disease. *Cell* **131**, 873–886 (2007).

21. Stetson, D. B., Ko, J. S., Heidmann, T. & Medzhitov, R. Trex1 prevents cell-intrinsic initiation of autoimmunity. *Cell* **134**, 587–598 (2008).

22. Rego, S. L. *et al.* TREX1 D18N mice fail to process erythroblast DNA resulting in inflammation and dysfunctional erythropoiesis. *Autoimmunity* **51**, 333–344 (2018).

23. Crow, Y. J. Type I interferonopathies: a novel set of inborn errors of immunity. *Ann. N. Y. Acad. Sci.* **1238**, 91–98 (2011).

24. Rice, G. I. *et al.* Assessment of interferon-related biomarkers in Aicardi-Goutières syndrome associated with mutations in TREX1, RNASEH2A, RNASEH2B, RNASEH2C, SAMHD1, and ADAR: a case-control study. *Lancet Neurol.* **12**, 1159–1169 (2013).

25. Rice, G. I., Rodero, M. P. & Crow, Y. J. Human Disease Phenotypes Associated With Mutations in TREX1. *J. Clin. Immunol.* **35**, 235–243 (2015).

26. Orebaugh, C. D., Fye, J. M., Harvey, S., Hollis, T. & Perrino, F. W. The TREX1 Exonuclease R114H Mutation in Aicardi-Goutières Syndrome and Lupus Reveals Dimeric Structure Requirements for DNA Degradation Activity♦. *J. Biol. Chem.* **286**, 40246–40254 (2011).

27. Rice, G. *et al.* Heterozygous Mutations in TREX1 Cause Familial Chilblain Lupus and Dominant Aicardi-Goutières Syndrome. *Am. J. Hum. Genet.* **80**, 811–815 (2007).

28. Lehtinen, D. A., Harvey, S., Mulcahy, M. J., Hollis, T. & Perrino, F. W. The TREX1 Double-stranded DNA Degradation Activity Is Defective in Dominant Mutations Associated with Autoimmune Disease. *J. Biol. Chem.* **283**, 31649–31656 (2008).

29. Fye, J. M., Orebaugh, C. D., Coffin, S. R., Hollis, T. & Perrino, F. W. Dominant Mutations of the TREX1 Exonuclease Gene in Lupus and Aicardi-Goutières Syndrome. *J. Biol. Chem.* **286**, 32373–32382 (2011).

30. Richards, A. *et al.* C-terminal truncations in human 3′-5′ DNA exonuclease TREX1 cause autosomal dominant retinal vasculopathy with cerebral leukodystrophy. *Nat. Genet.* **39**, 1068–1070 (2007).

31. Pelzer, N. *et al.* Heterozygous TREX1 mutations in early-onset cerebrovascular disease. *J. Neurol.* **260**, 2188–2190 (2013).

32. Tan, R. Y. Y. *et al.* How common are single gene mutations as a cause for lacunar stroke? *Neurology* **93**, e2007–e2020 (2019).

33. McGlasson, S. *et al.* Rare variants of the 3’-5’ DNA exonuclease TREX1 in early onset small vessel stroke. *Wellcome Open Res.* **2**, 106 (2017).

34. Hemphill, W. O. & Perrino, F. W. Measuring TREX1 and TREX2 exonuclease activities. *Methods Enzymol.* **625**, 109–133 (2019).

35. Benjamin, P. *et al.* Spectrum of Neuroradiologic Findings Associated with Monogenic Interferonopathies. *Am. J. Neuroradiol.* **43**, 2–10 (2022).

36. Lazea, C., Sur, L. & Florea, M. ROHHAD (Rapid-onset Obesity with Hypoventilation, Hypothalamic Dysfunction, Autonomic Dysregulation) Syndrome—What Every Pediatrician Should Know About the Etiopathogenesis, Diagnosis and Treatment: A Review. *Int. J. Gen. Med.* **14**, 319–326 (2021).

37. Wardlaw, J. M. *et al.* Neuroimaging standards for research into small vessel disease and its contribution to ageing and neurodegeneration. *Lancet Neurol.* **12**, 822–838 (2013).

38. Perrino, F. W., Harvey, S., McMillin, S. & Hollis, T. The Human TREX2 3′ → 5′-Exonuclease Structure Suggests a Mechanism for Efficient Nonprocessive DNA Catalysis. *J. Biol. Chem.* **280**, 15212–15218 (2005).

39. Perrino, F. W. *et al.* Cooperative DNA Binding and Communication across the Dimer Interface in the TREX2 3′ → 5′-Exonuclease. *J. Biol. Chem.* **283**, 21441–21452 (2008).

40. Raraigh, K. S. *et al.* Functional Assays Are Essential for Interpretation of Missense Variants Associated with Variable Expressivity. *Am. J. Hum. Genet.* **102**, 1062–1077 (2018).

41. Richards, S. *et al.* Standards and Guidelines for the Interpretation of Sequence Variants: A Joint Consensus Recommendation of the American College of Medical Genetics and Genomics and the Association for Molecular Pathology. *Genet. Med. Off. J. Am. Coll. Med. Genet.* **17**, 405–424 (2015).

42. Matthijs, G. *et al.* Guidelines for diagnostic next-generation sequencing. *Eur. J. Hum. Genet.* **24**, 1515 (2016).

43. Hamosh, A., Scott, A. F., Amberger, J. S., Bocchini, C. A. & McKusick, V. A. Online Mendelian Inheritance in Man (OMIM), a knowledgebase of human genes and genetic disorders. *Nucleic Acids Res.* **33**, D514–D517 (2005).

44. Rentzsch, P., Witten, D., Cooper, G. M., Shendure, J. & Kircher, M. CADD: predicting the deleteriousness of variants throughout the human genome. *Nucleic Acids Res.* **47**, D886–D894 (2019).

45. Adzhubei, I., Jordan, D. M. & Sunyaev, S. R. Predicting Functional Effect of Human Missense Mutations Using PolyPhen-2. *Curr. Protoc. Hum. Genet. Editor. Board Jonathan Haines Al* **0 7**, Unit7.20 (2013).

46. Ng, P. C. & Henikoff, S. SIFT: predicting amino acid changes that affect protein function. *Nucleic Acids Res.* **31**, 3812–3814 (2003).

47. Kopanos, C. *et al.* VarSome: the human genomic variant search engine. *Bioinformatics* **35**, 1978–1980 (2019).

48. Landrum, M. J. *et al.* ClinVar: public archive of interpretations of clinically relevant variants. *Nucleic Acids Res.* **44**, D862–D868 (2016).

49. Rehder, C. *et al.* Next-generation sequencing for constitutional variants in the clinical laboratory, 2021 revision: a technical standard of the American College of Medical Genetics and Genomics (ACMG). *Genet. Med. Off. J. Am. Coll. Med. Genet.* **23**, 1399–1415 (2021).

50. Volpi, S. *et al.* Efficacy and Adverse Events During Janus Kinase Inhibitor Treatment of SAVI Syndrome. *J. Clin. Immunol.* **39**, 476–485 (2019).
